# Supplementary material for: Evaluation of snow cover properties in ERA5 and ERA5-Land with several satellite-based datasets in the Northern Hemisphere in spring 1982–2018
Source: Copernicus journal article supplement (doi:10.5194/tc-17-5007-2023), 2023-11-29
Supplement: Supplementary file 1 [file tc-17-5007-2023-supplement.pdf]

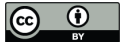

*Supplement of*

**Evaluation of snow cover properties in ERA5 and ERA5-Land with several satellite-based datasets in the Northern Hemisphere in spring 1982–2018**

**Kerttu Kouki et al.**

*Correspondence to:* Kerttu Kouki ([kerttu.kouki@fmi.fi](mailto:kerttu.kouki@fmi.fi))

The copyright of individual parts of the supplement might differ from the article licence.

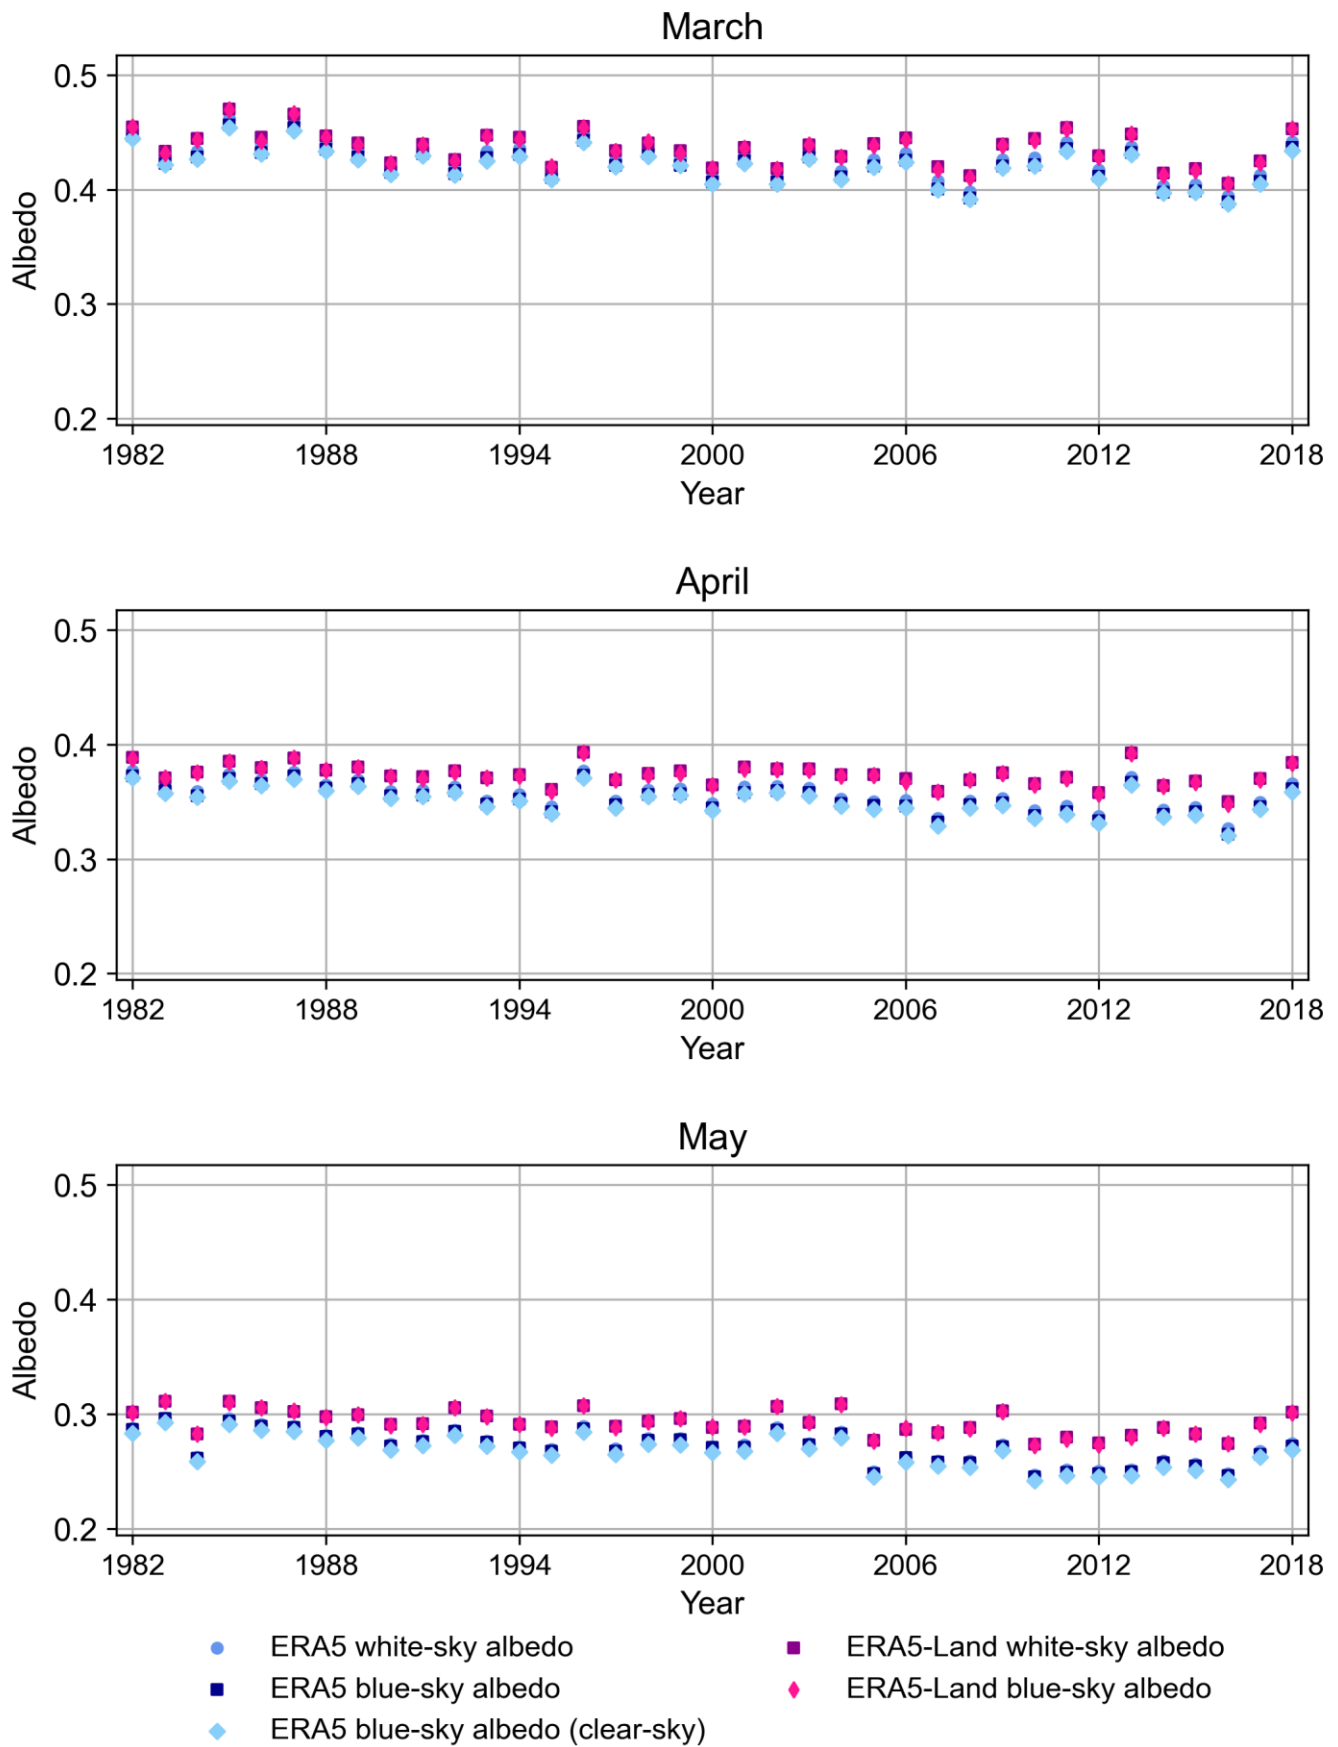

Figure S1. Monthly timeseries of different albedo estimates in ERA5 and ERA5-Land.

Mean differences in April 1982-2018

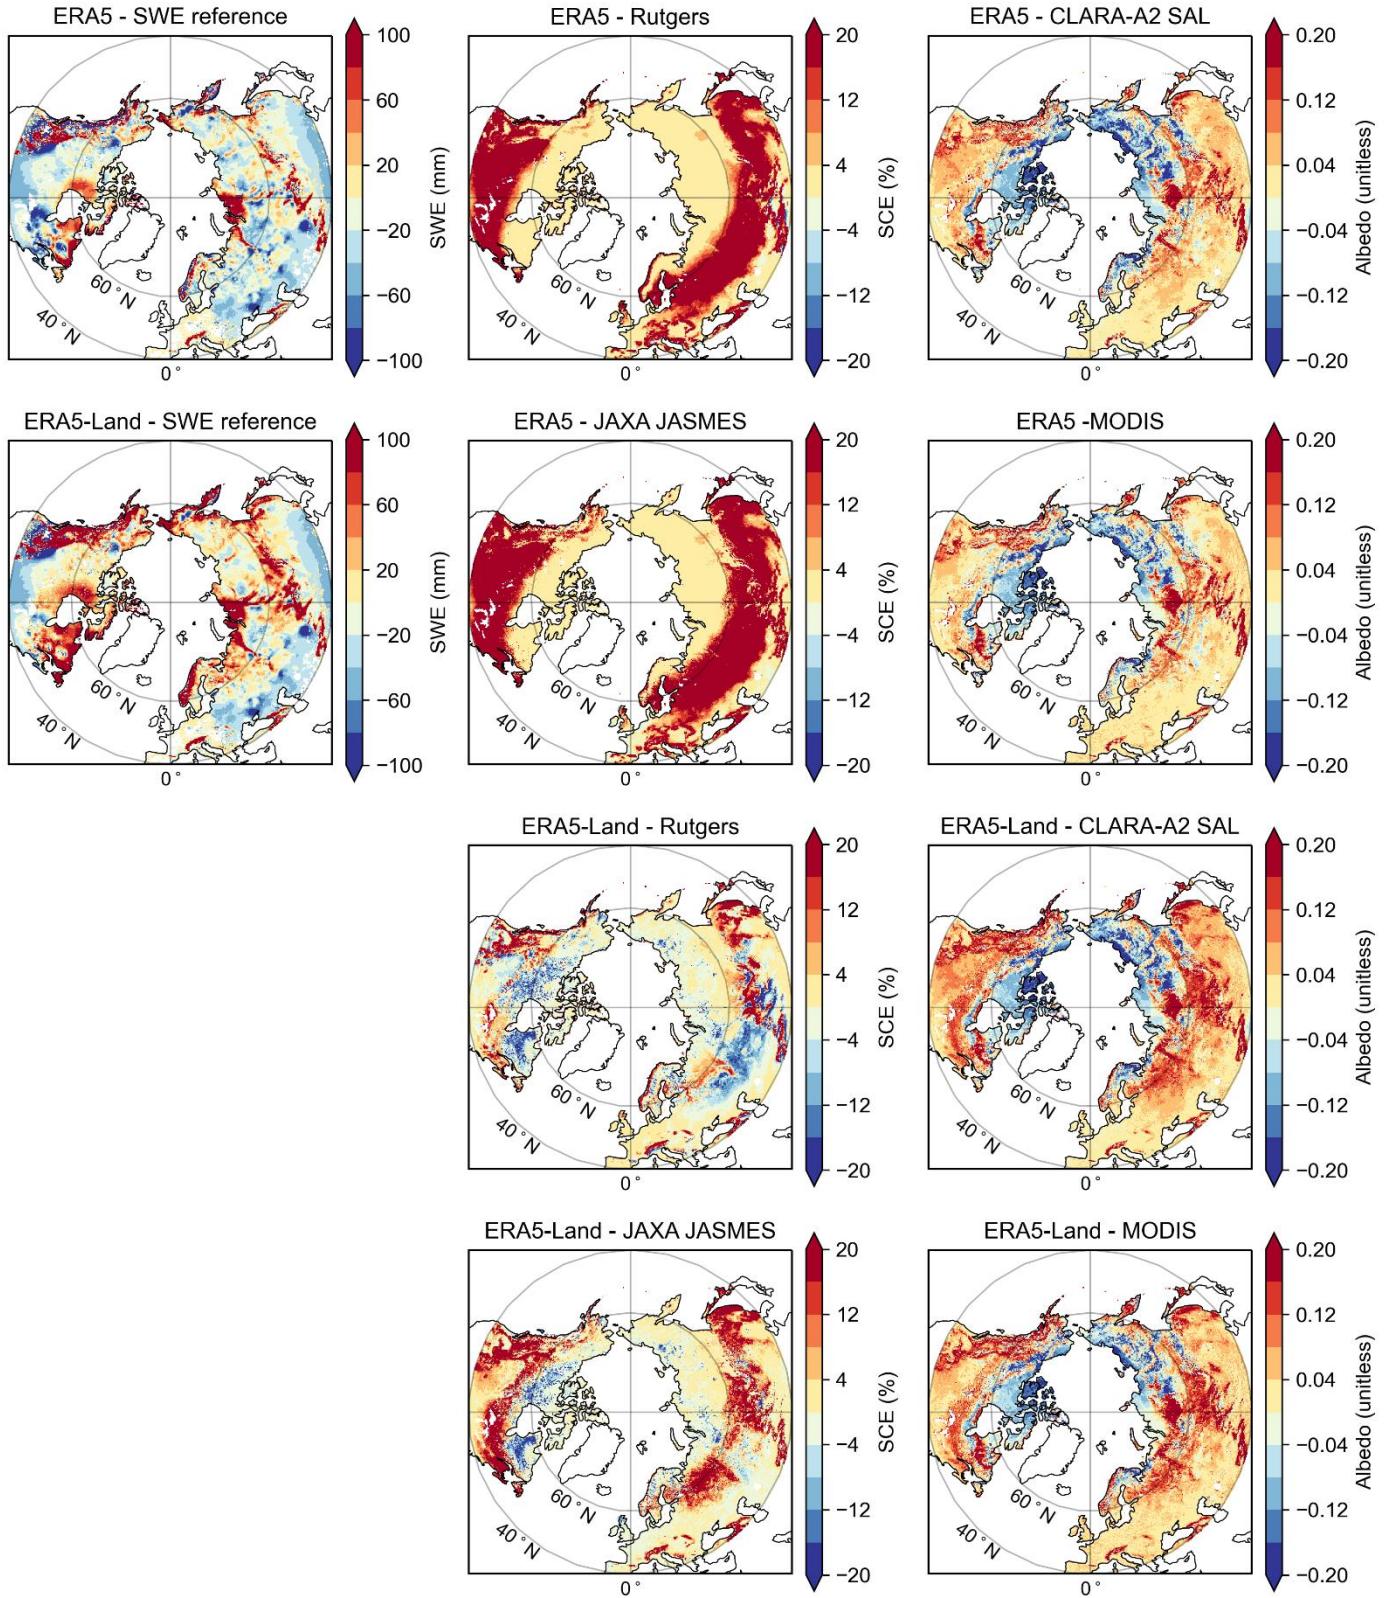

Figure S2. Monthly mean difference between ERA5 and ERA5 and each reference dataset in April 1982-2018 (ERA5-Land - MODIS 2000-2018).

Trends in April 1982-2018

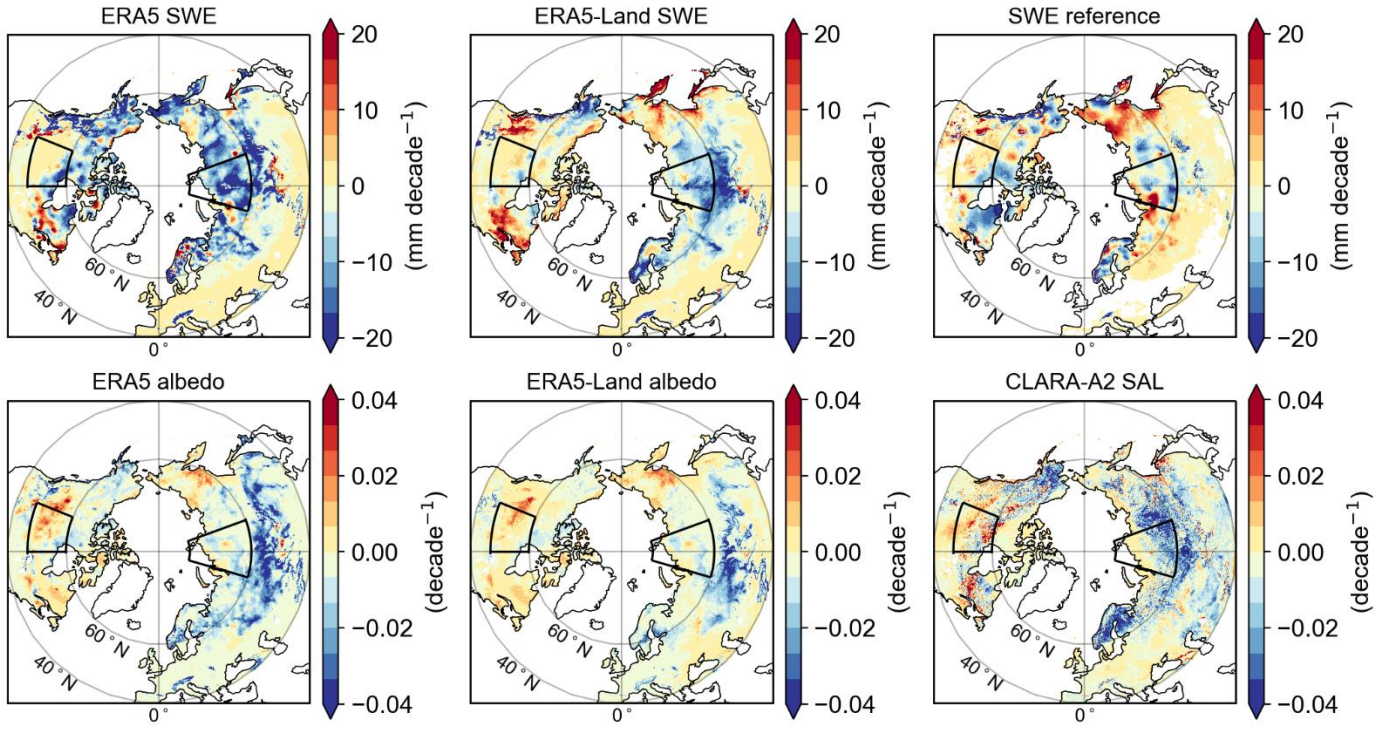

Figure S3. (top row) SWE trends in April 1982-2018. (bottom row) Albedo trends in April 1982-2018.

Trends in May 1982-2018

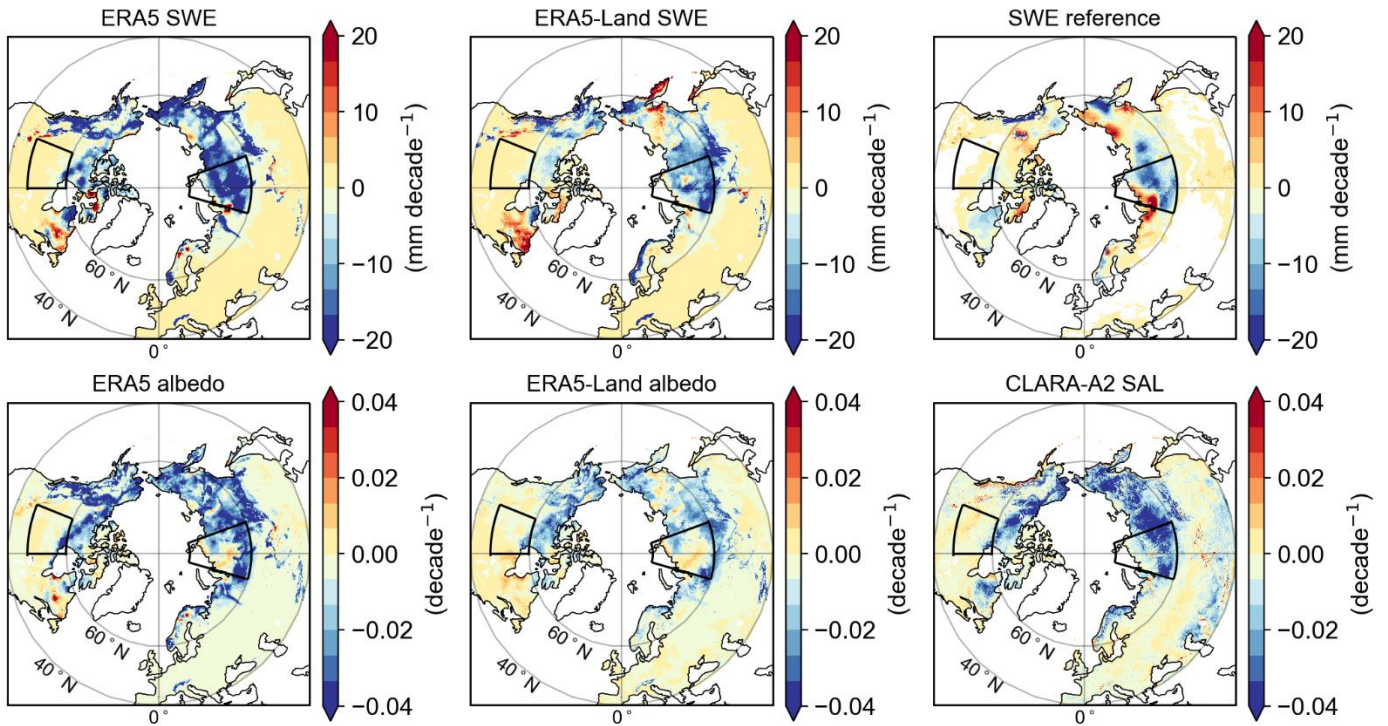

Figure S4. (top row) SWE trends in May 1982-2018. (bottom row) Albedo trends in May 1982-2018.

Trends in April 2000-2018

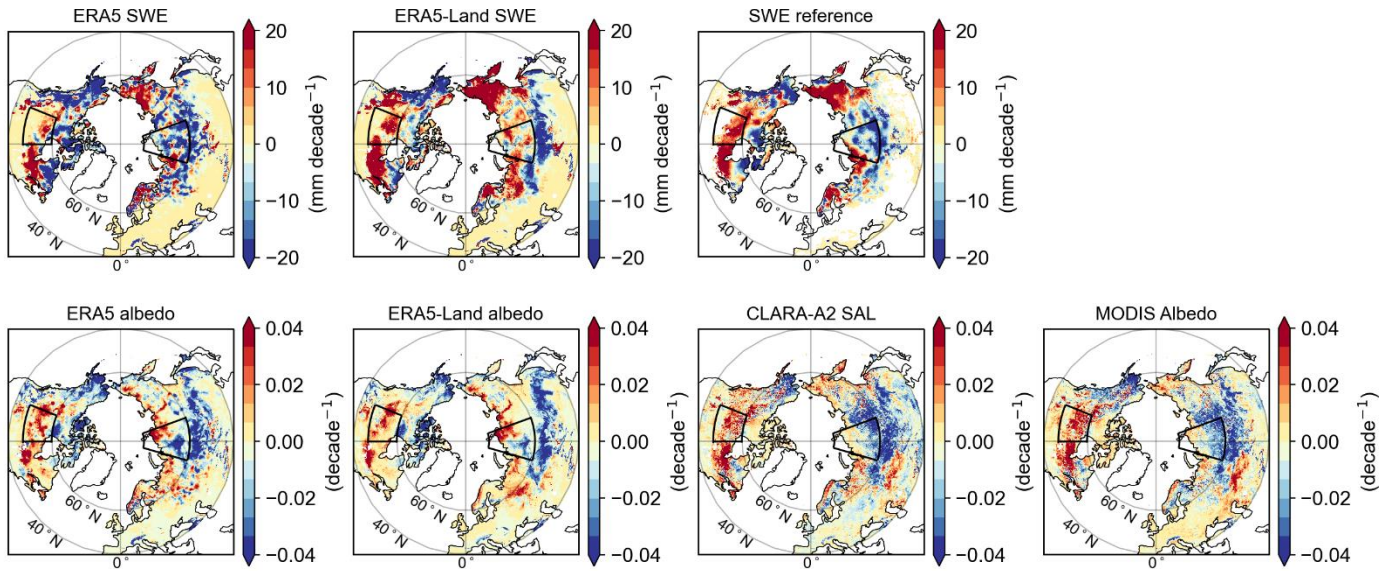

Figure S5. (top row) SWE trends in April 2000-2018. (bottom row) Albedo trends in April 2000-2018.

Trends in May 2000-2018

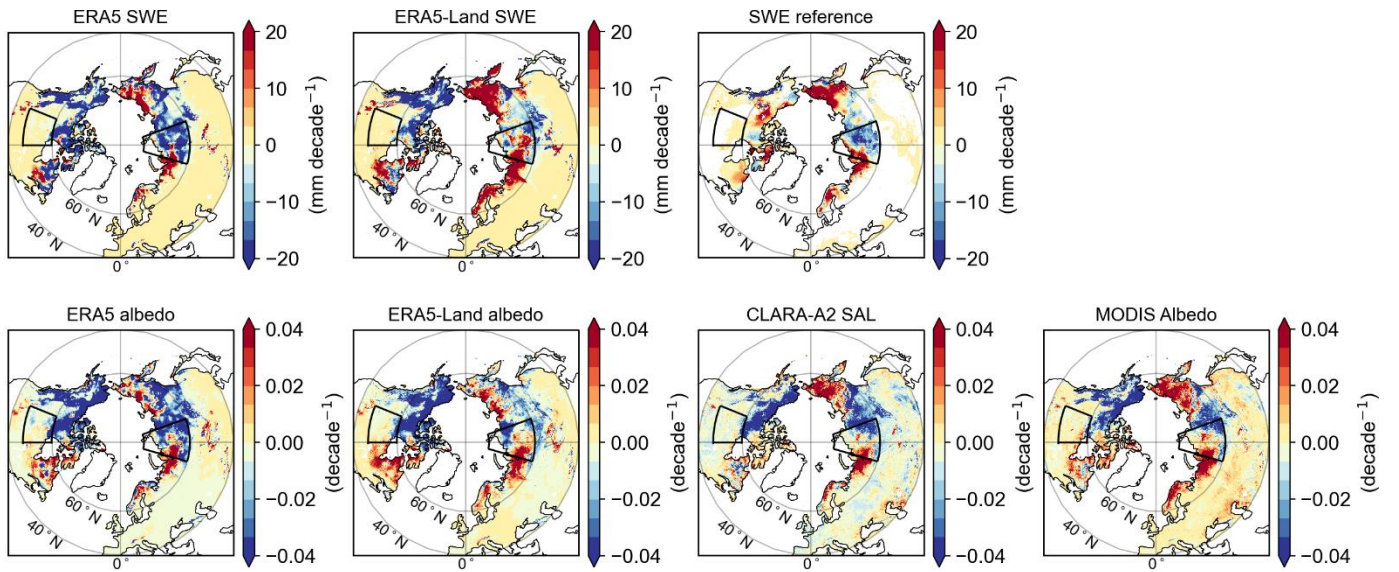

Figure S6. (top row) SWE trends in April 2000-2018. (bottom row) Albedo trends in April 2000-2018.

### Mean snow depth

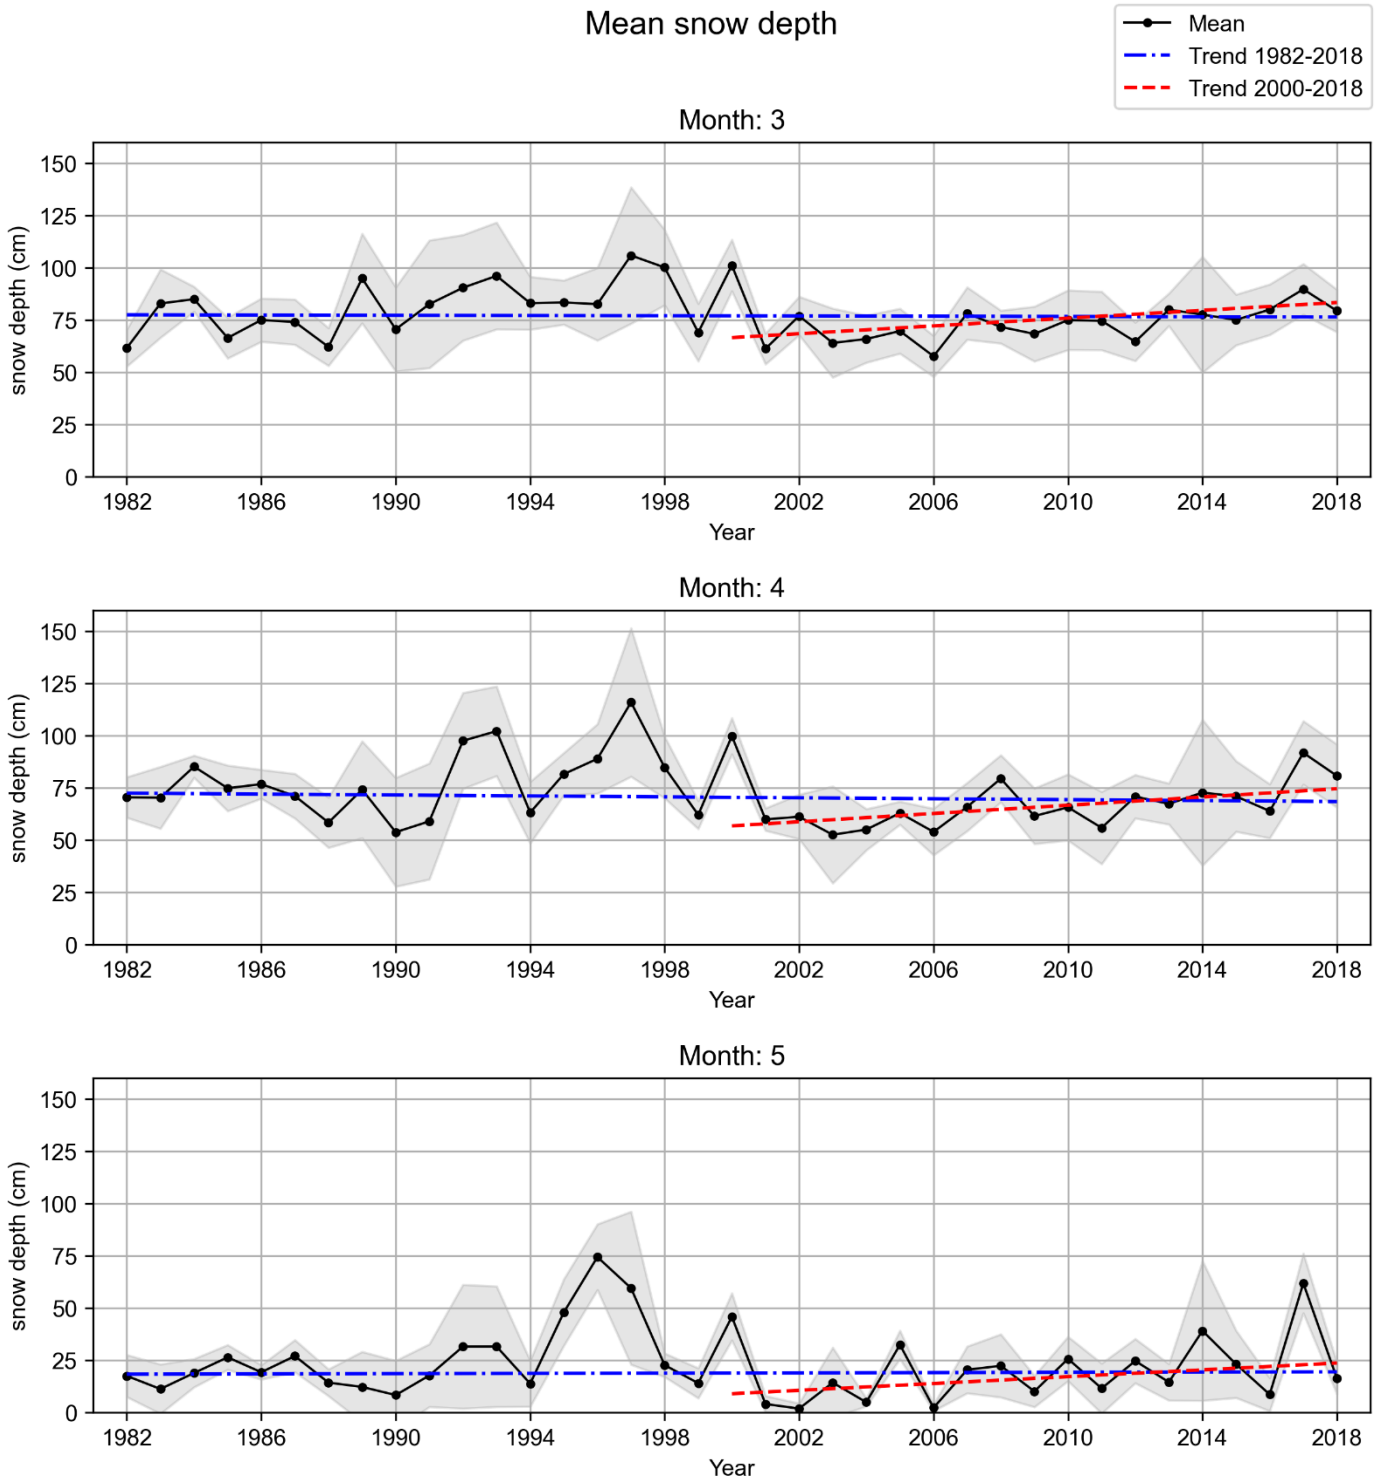

**Figure S7. Timeseries of mean in situ snow depth across Lapland. The shaded area is  $\pm\sigma$  from the mean value.  $\sigma$  = standard deviation.**

**Table S1. RMSE for every variable in ERA5 and ERA5-Land compared to each of the reference datasets. The values are calculated separately for each month (March, April, and May) for the entire study period 1982-2018.**

|                              | ERA5                          |                               |                               | ERA5-Land                     |                               |                               |
|------------------------------|-------------------------------|-------------------------------|-------------------------------|-------------------------------|-------------------------------|-------------------------------|
|                              | March                         | April                         | May                           | March                         | April                         | May                           |
| <b>SWE reference</b>         | 1310 Gt                       | 1400 Gt                       | 1200 Gt                       | 2810 Gt                       | 3160 Gt                       | 2780 Gt                       |
| <b>Rutgers (SCE)</b>         | $5.4 \cdot 10^6 \text{ km}^2$ | $7.6 \cdot 10^6 \text{ km}^2$ | $7.8 \cdot 10^6 \text{ km}^2$ | $1.3 \cdot 10^6 \text{ km}^2$ | $1.0 \cdot 10^6 \text{ km}^2$ | $1.2 \cdot 10^6 \text{ km}^2$ |
| <b>JAXA JASMES (SCE)</b>     | $5.8 \cdot 10^6 \text{ km}^2$ | $9.2 \cdot 10^6 \text{ km}^2$ | $9.7 \cdot 10^6 \text{ km}^2$ | $0.8 \cdot 10^6 \text{ km}^2$ | $2.1 \cdot 10^6 \text{ km}^2$ | $2.8 \cdot 10^6 \text{ km}^2$ |
| <b>CLARA-A2 SAL (albedo)</b> | 0.02                          | 0.02                          | 0.02                          | 0.03                          | 0.04                          | 0.05                          |
